# Supplementary material for: Dendritic NMDA receptors in parvalbumin neurons enable strong and stable neuronal assemblies
Source: eLife journal article supplement (doi:10.7554/elife.49872), 2019-10-28

**A**

Amplitude

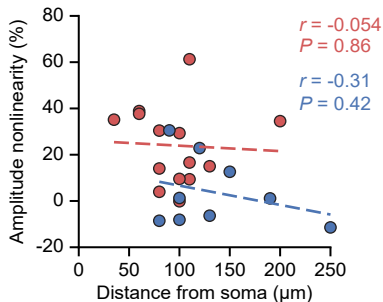**B**

Amplitude nonlinearity vs arithmetic sum max amplitude

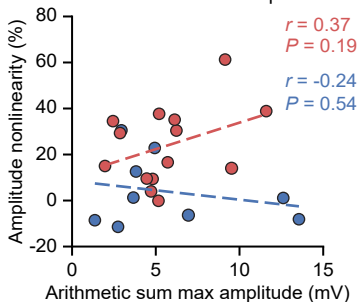**C**

Integral

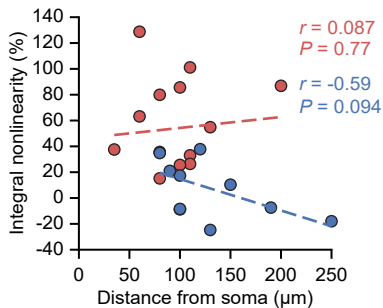**D**

Integral nonlinearity vs arithmetic sum max integral

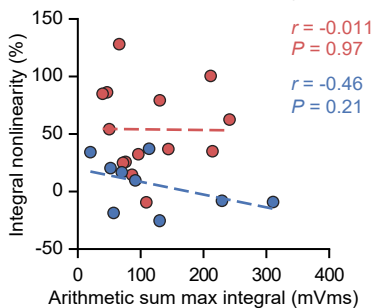

Supplement: supp [file elife_poa_e49872_Figure_1_figure_supplement_4.pdf › elife_poa_e49872_Figure_1_figure_supplement_4.pdf]
