# Supplementary material for: Dendritic NMDA receptors in parvalbumin neurons enable strong and stable neuronal assemblies
Source: eLife journal article supplement (doi:10.7554/elife.49872), 2019-10-28

**A**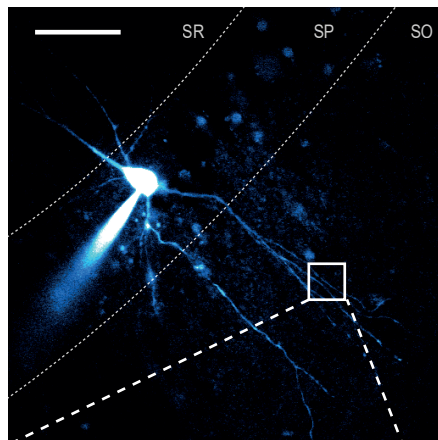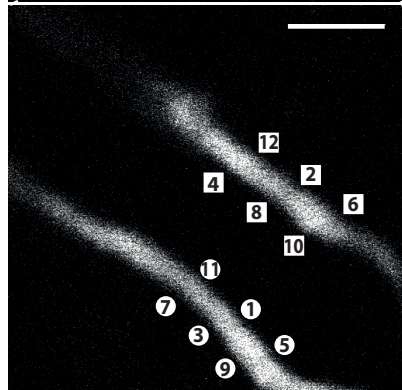**B**

1 + 3 + 5 + 7 + 9 + 11

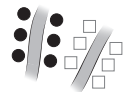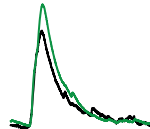

2 + 4 + 6 + 8 + 10 + 12

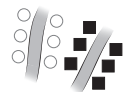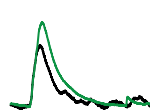

Mean nonlinearity:  
**33%**

1 + 2 + 3 + 4 + 5 + 6

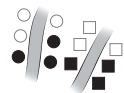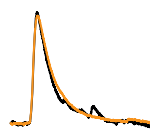

4 + 5 + 6 + 7 + 8 + 9

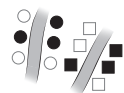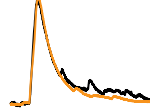

Mean nonlinearity:  
**15%**

7 + 8 + 9 + 10 + 11 + 12

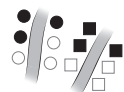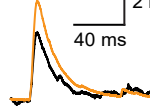

— Arithmetic sum  
— Recorded uEPSPs (single dendrite)  
— Recorded uEPSPs (mixed dendrites)

**C**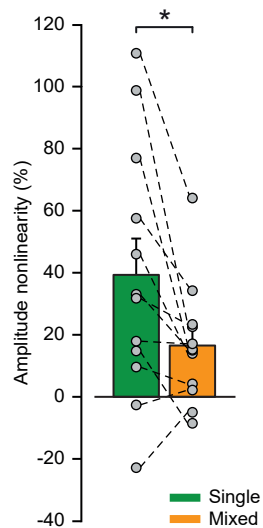

Supplement: supp [file elife_poa_e49872_Figure_1_figure_supplement_5.pdf › elife_poa_e49872_Figure_1_figure_supplement_5.pdf]
