# Supplementary figures and images for: Dendritic NMDA receptors in parvalbumin neurons enable strong and stable neuronal assemblies
Source: eLife journal article supplement (doi:10.7554/elife.49872), 2019-10-28

**A**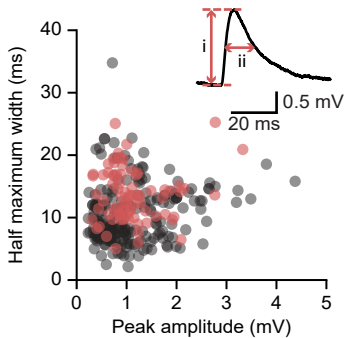**B**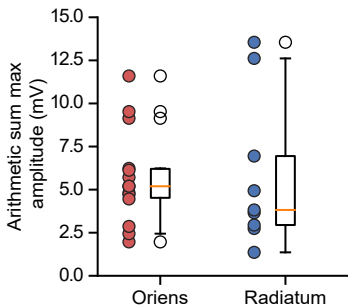**C**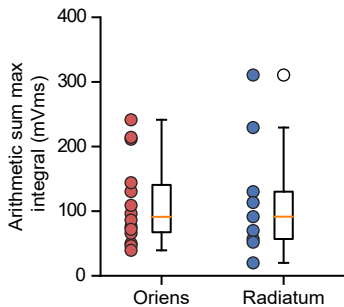

Supplement: supp [file elife_poa_e49872_Figure_1_figure_supplement_1.pdf › elife_poa_e49872_Figure_1_figure_supplement_1.pdf]

**A**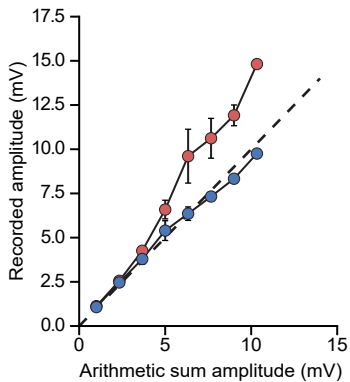**B**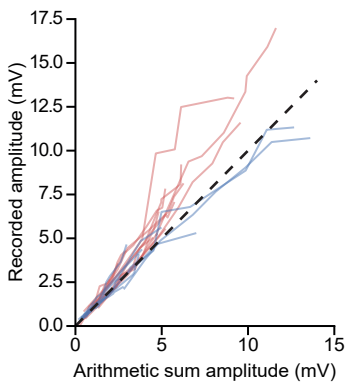**C**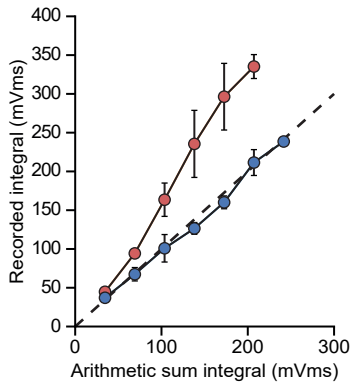**D**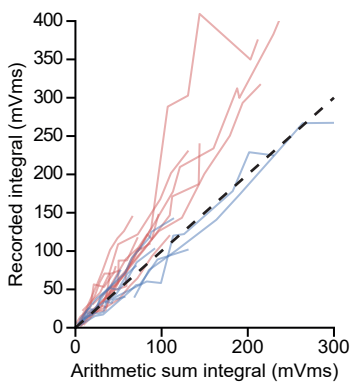

Supplement: supp [file elife_poa_e49872_Figure_1_figure_supplement_2.pdf › elife_poa_e49872_Figure_1_figure_supplement_2.pdf]

**A**

Amplitude

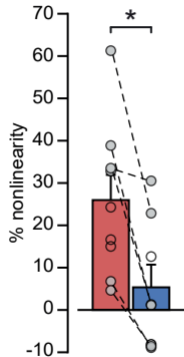**B**

Integral

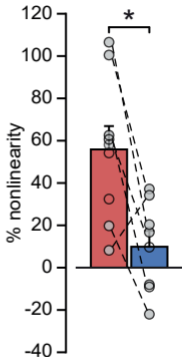

■ Radiatum  
■ Oriens

Supplement: supp [file elife_poa_e49872_Figure_1_figure_supplement_3.pdf › elife_poa_e49872_Figure_1_figure_supplement_3.pdf]

**A**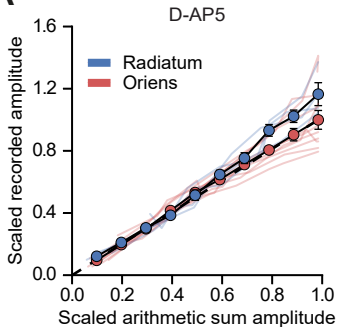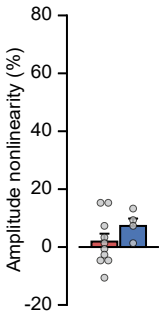**B**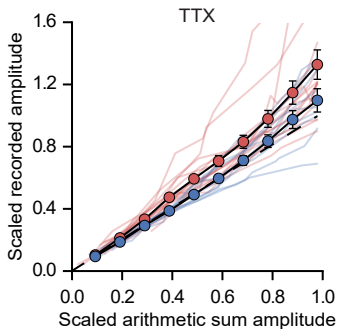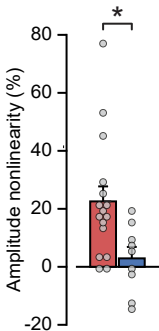

Supplement: supp [file elife_poa_e49872_Figure_2_figure_supplement_1.pdf › elife_poa_e49872_Figure_2_figure_supplement_1.pdf]

**A**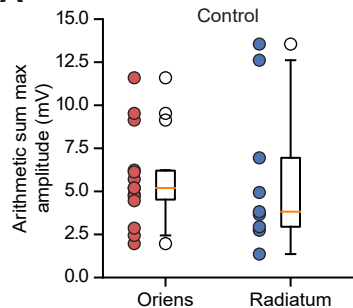**B**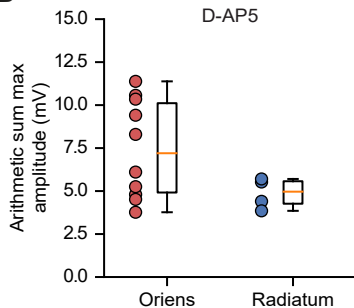**C**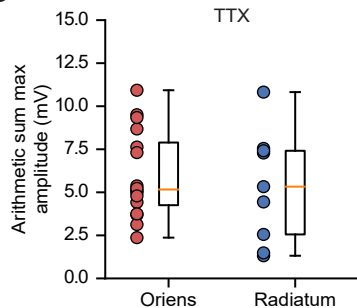**D**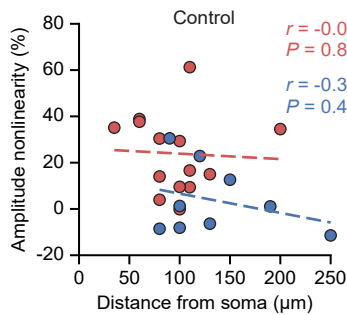**E**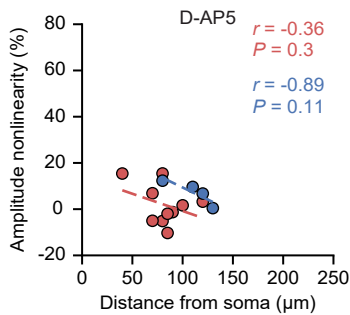**F**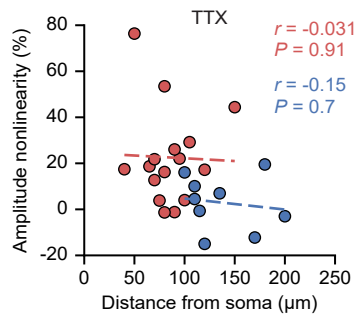

Supplement: supp [file elife_poa_e49872_Figure_2_figure_supplement_2.pdf › elife_poa_e49872_Figure_2_figure_supplement_2.pdf]

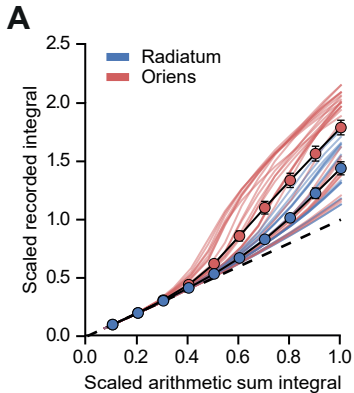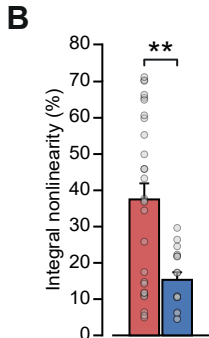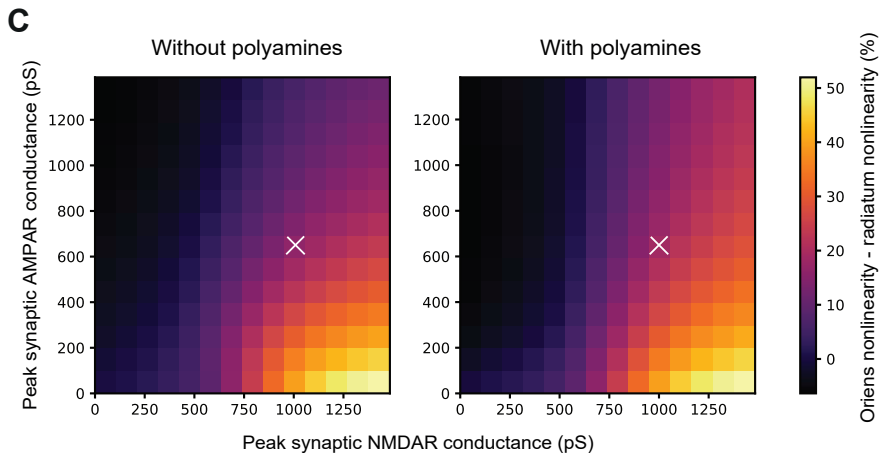

Supplement: supp [file elife_poa_e49872_Figure_3_figure_supplement_1.pdf › elife_poa_e49872_Figure_3_figure_supplement_1.pdf]

**A**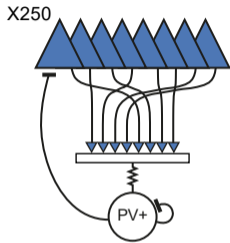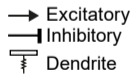**B**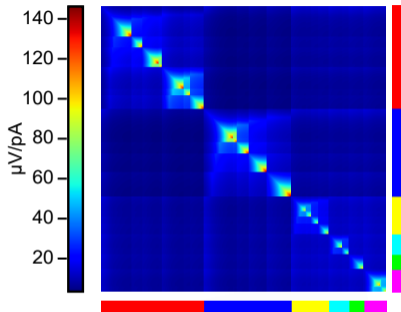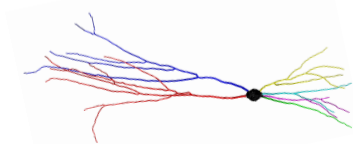**C**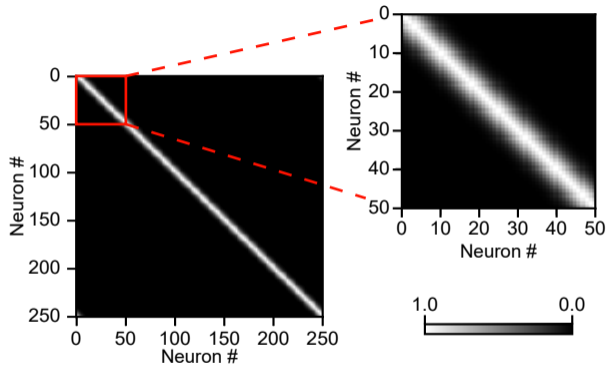

Supplement: supp [file elife_poa_e49872_Figure_5_figure_supplement_1.pdf › elife_poa_e49872_Figure_5_figure_supplement_1.pdf]

**A**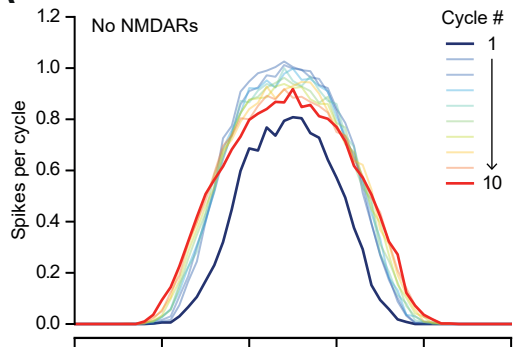**B**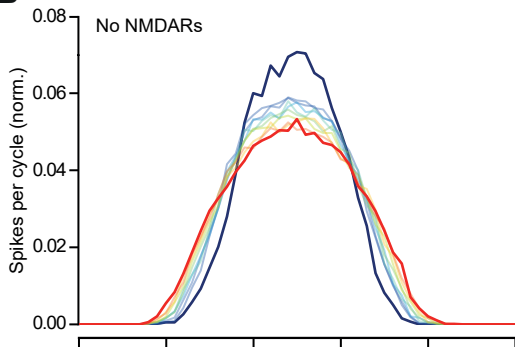**C**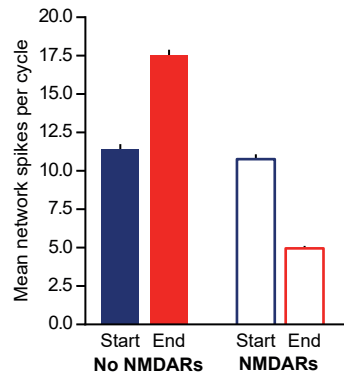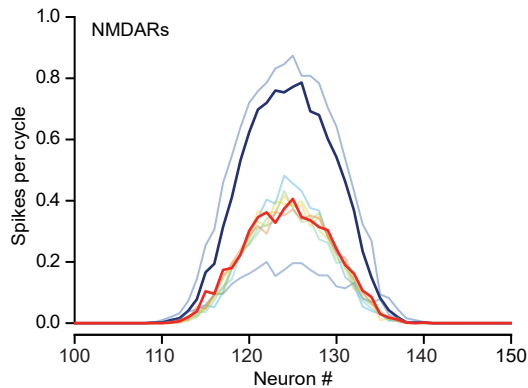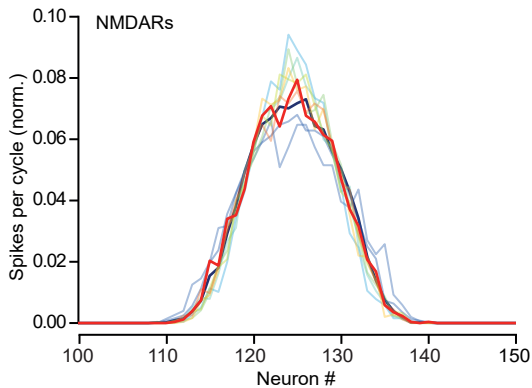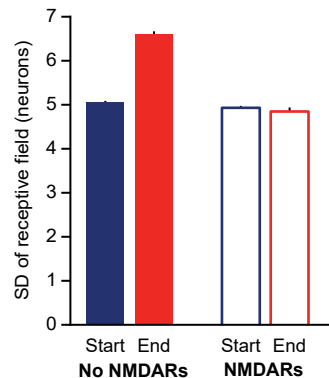

Supplement: supp [file elife_poa_e49872_Figure_5_figure_supplement_2.pdf › elife_poa_e49872_Figure_5_figure_supplement_2.pdf]

**A**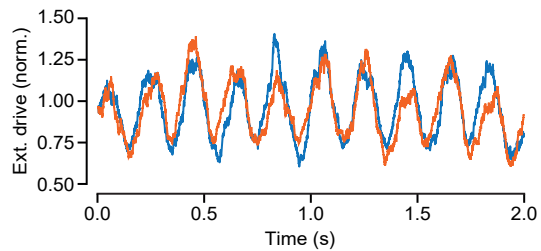**C**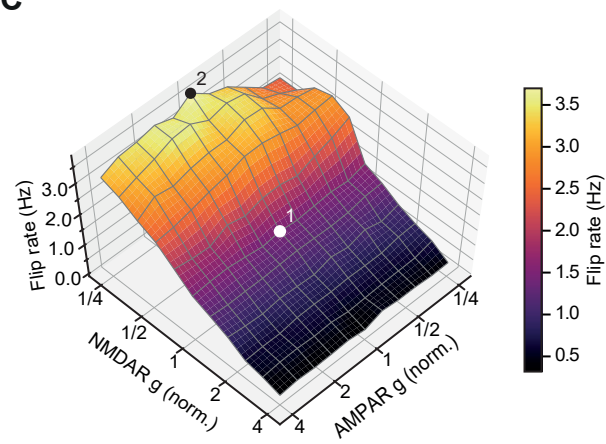**B**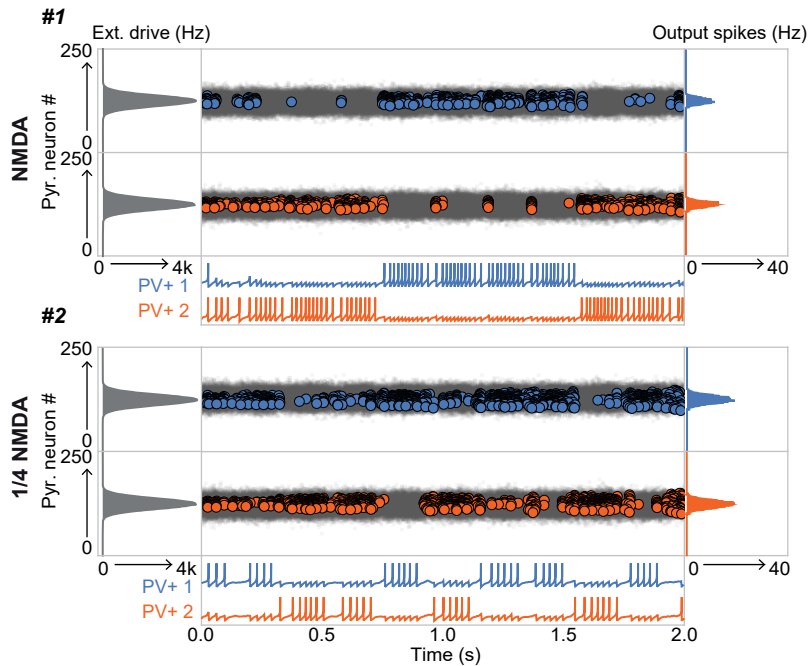

Supplement: supp [file elife_poa_e49872_Figure_7_figure_supplement_1.pdf › elife_poa_e49872_Figure_7_figure_supplement_1.pdf]
